# Supplementary material
Source: MDPI journal article supplement (https://www.mdpi.com/2073-4441/16/9/1215)
Supplement: s1 [file s1]

**Supplementary Table S1:** Detailed records of earthquakes above magnitude 4 within 400 km of the Maqu, Meixi, and Jiulongxia continuous monitoring stations.

| No. | Location  | Longitude | Latitude | Time       | Magnitude | Depth(km) | Dist_to_Maqu(km) | Dist_to_Maixi(km) | Dist_to_Jiulongxia(km) |
|-----|-----------|-----------|----------|------------|-----------|-----------|------------------|-------------------|------------------------|
| 1   | Shiqu     | 99.02     | 32.92    | 2021/7/5   | 4.0       | 7         | 325              | 341               | -                      |
| 2   | Maduo     | 98.28     | 34.68    | 2021/7/6   | 4.0       | 10        | 373              | 390               | -                      |
| 3   | Maqin     | 99.02     | 34.47    | 2021/7/7   | 4.4       | 9         | 303              | 320               | -                      |
| 4   | Maqin     | 98.95     | 34.5     | 2021/7/7   | 4.1       | 9         | 310              | 327               | -                      |
| 5   | Maduo     | 98        | 34.74    | 2021/7/8   | 4.9       | 10        | 400              | -                 | -                      |
| 6   | Wenchuan  | 103.37    | 30.97    | 2021/7/14  | 4.8       | 15        | 354              | 349               | 333                    |
| 7   | Maduo     | 98.29     | 34.68    | 2021/8/11  | 4.7       | 11        | 372              | 390               | -                      |
| 8   | Gande     | 100.58    | 34.21    | 2021/12/6  | 4.7       | 9         | 157              | 174               | 288                    |
| 9   | Qingchuan | 105.13    | 32.34    | 2022/1/20  | 4.0       | 10        | 325              | 311               | 224                    |
| 10  | Beichuan  | 104.27    | 31.91    | 2022/2/1   | 4.0       | 10        | 300              | 289               | 233                    |
| 11  | Beichuan  | 104.46    | 31.89    | 2022/5/8   | 4.1       | 8         | 313              | 301               | 240                    |
| 13  | Maerkang  | 101.82    | 32.27    | 2022/6/10  | 5.8       | 10        | 199              | 203               | 255                    |
| 14  | Maerkang  | 101.79    | 32.26    | 2022/6/10  | 4.1       | 10        | 201              | 205               | 258                    |
| 15  | Maerkang  | 101.79    | 32.28    | 2022/6/10  | 4.4       | 10        | 198              | 203               | 256                    |
| 16  | Maerkang  | 101.82    | 32.25    | 2022/6/10  | 6.0       | 13        | 201              | 206               | 257                    |
| 17  | Maerkang  | 101.85    | 32.24    | 2022/6/10  | 5.2       | 15        | 202              | 206               | 256                    |
| 18  | Maerkang  | 101.84    | 32.23    | 2022/6/10  | 4.4       | 12        | 203              | 207               | 257                    |
| 19  | Maerkang  | 101.79    | 32.25    | 2022/6/14  | 4.4       | 11        | 202              | 206               | 259                    |
| 20  | Maduo     | 99.14     | 35.56    | 2022/12/22 | 5.0       | 9         | 333              | 348               | -                      |

Notes: “-” indicates that the distance from the earthquake to the continuous monitoring station exceeds 400 km.
